# Supplementary material for: Nepenthes-inspired multifunctional nanoblades with mechanical bactericidal, self-cleaning and insect anti-adhesive characteristics
Source: Royal Society of Chemistry journal article supplement (doi:10.1039/c9ra05198h), 2019-01-01
Supplement: c9ra05198h1.pdf [file c9ra05198h1.pdf]

## Supporting Information

# *Nepenthes*-inspired Multifunctional Nanoblades with Mechanical Bactericidal, Self-cleaning and Insect Anti-adhesive Characteristics

Yuan Xie<sup>a</sup>, Jinyang Li<sup>a,\*</sup>, Daqin Bu<sup>a</sup>, Xuedong Xie<sup>a</sup>, Xiaolong He<sup>b</sup>, Li Wang<sup>c,\*</sup>, and Zuowan Zhou<sup>a</sup>

<sup>a</sup>*School of Materials Science and Engineering, Southwest Jiaotong University, Chengdu 610031, China.*

<sup>b</sup>*National Laboratory of Biomacromolecules, Institute of Biophysics, Chinese Academy of Sciences, Beijing 100101, China.*

<sup>c</sup>*Qian Xuesen Laboratory of Space Technology, Beijing 100094, China.*

\*Corresponding Authors:

Jinyang Li; E-mail: [jinyang.li@swjtu.edu.cn](mailto:jinyang.li@swjtu.edu.cn).

Li Wang; E-mail: [wangli@qxslab.cn](mailto:wangli@qxslab.cn).

**KEYWORDS** *Bio-inspired; Nanoblade; Mechanical bactericidal activity; Insect nonadhesive; Self-cleaning.*

## **Contents:**

- A: The bactericidal performance of peristome surface of the *Nepenthes alata* pitcher
- B: Difference in  $\cdot\text{O}_2^-$  and  $\text{H}_2\text{O}_2$  productivity of NNBs and CNNBs in dark
- C: Interaction between bacteria cells and NNBs surface
- D: The topography change of ANBs prepared with different growth temperature
- E: Characteristics of the artificial nanoblades
- F: Correlation between artificial nanoblades morphology and bactericidal performance
- G: Difference in  $\cdot\text{O}_2^-$  and  $\text{H}_2\text{O}_2$  productivity of  $\text{H}_2\text{O}$  and ANBs in dark
- H: Difference in  $\text{Zn}^{2+}$  and  $\text{Al}^{3+}$  productivity of ANBs

**A: The bactericidal performance of peristome surface of the *Nepenthes alata* pitcher**

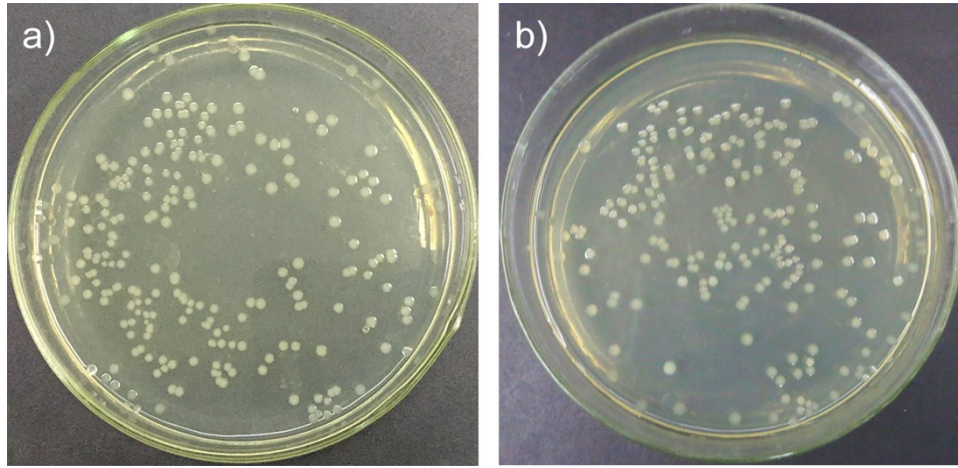

**Figure S1.** Optical images of the colony count of *E. coli* incubated with peristome of *Nepenthes* for 10 min. a) glass slide, b) peristome of *Nepenthes*.

## B: Difference in $\cdot\text{O}_2^-$ and $\text{H}_2\text{O}_2$ productivity of NNBs and CNNBs in dark

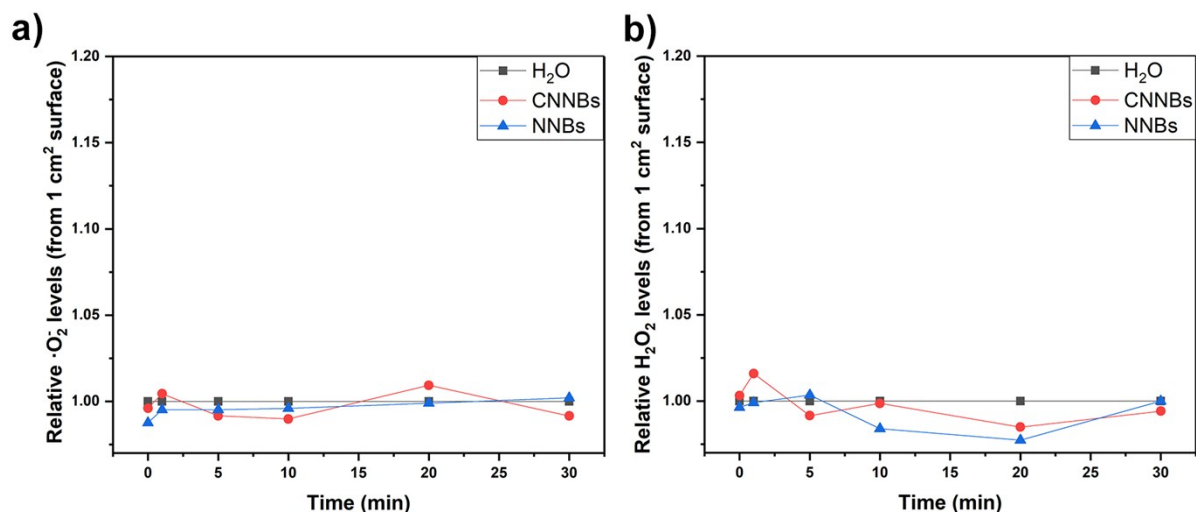

**Figure S2.** Production of  $\cdot\text{O}_2^-$  and  $\text{H}_2\text{O}_2$  of NNBs and CNNBs as the function of time.

A superoxide assay kit was used to compare the difference productivity of  $\cdot\text{O}_2^-$ . The absorbance at 450 nm of formazan compounds indicated the concentration of  $\cdot\text{O}_2^-$  by the NNBs is very closed to that of H<sub>2</sub>O and CNNBs samples, indicating  $\cdot\text{O}_2^-$  is not the major factor responsible for the as-observed bactericidal behavior. Similarly, a hydrogen peroxide kit was used to compare the productivity of  $\text{H}_2\text{O}_2$  of these samples. The absorbance at 560 nm of Fe<sup>3+</sup>-xylenol orange compounds indicated the concentration of  $\text{H}_2\text{O}_2$  by the samples is also very closed, showing  $\text{H}_2\text{O}_2$  is not the major factor responsible for the as-observed bactericidal behavior.

C: Interaction between bacteria cells and NNBs surface

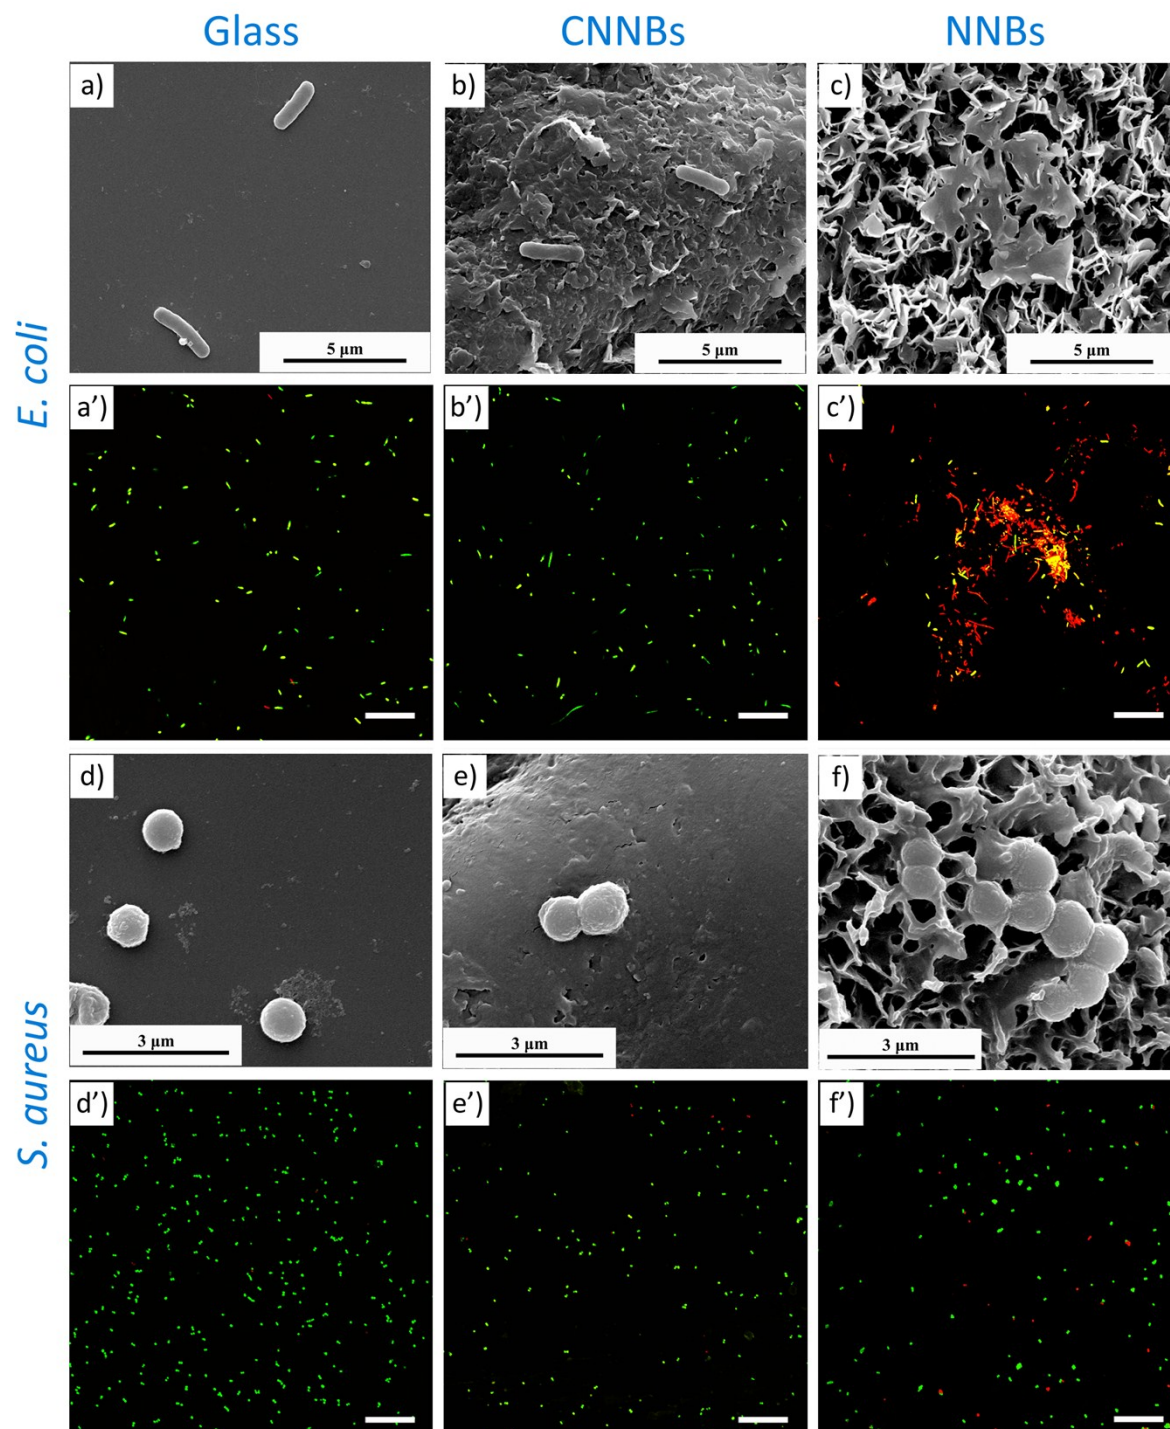

**Figure S3.** Interaction between bacteria cells and NNBs surface. *E. coli* and *S. aureus* cells on glass, CNNBs and NNBs after 10 min contact. a-f) SEM image, a'-f') CLSM image.

**D: The topography change of ANBs prepared with different growth temperature**

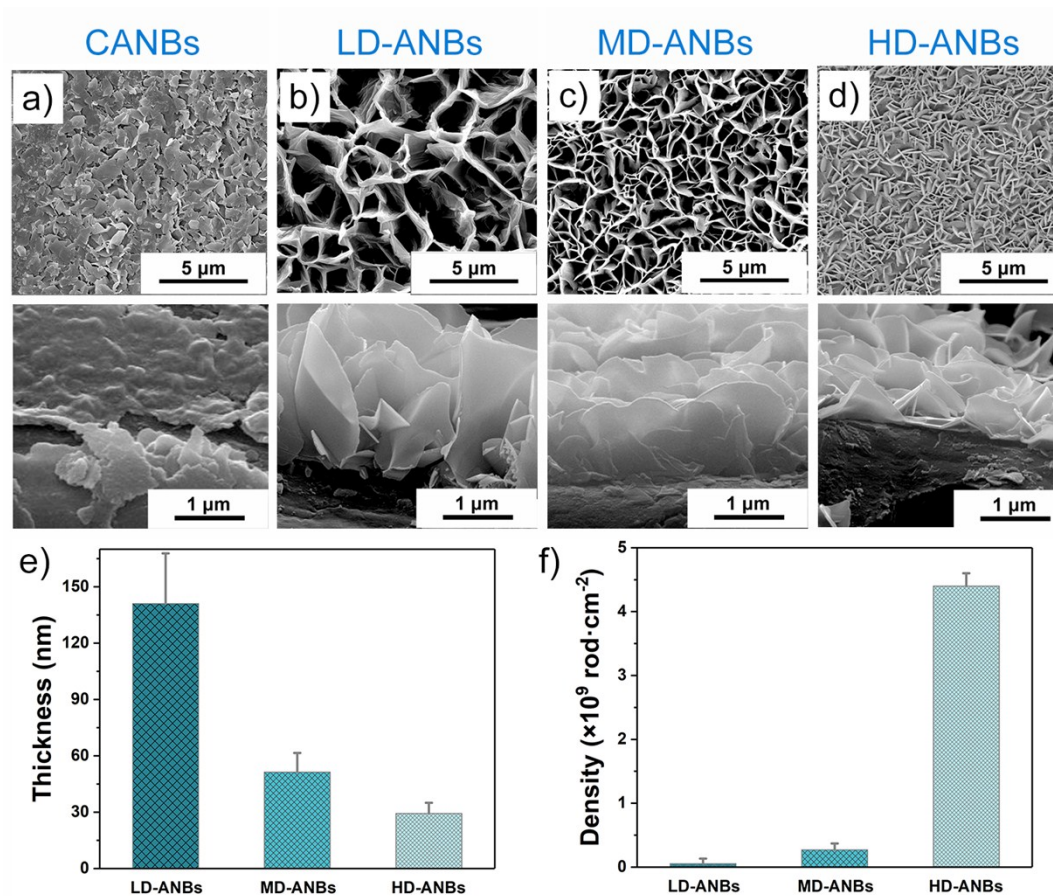

**Figure S4.** The topography change of ANBs prepared with different growth temperature. a) b-d) SEM images of ANBs hydrothermally grown on aluminum alloy sheet at 90, 70 and 50 °C, respectively, average topographic parameters: e) tip-width and f) density, as determined by SEM.

## E: Characteristics of the ANBs

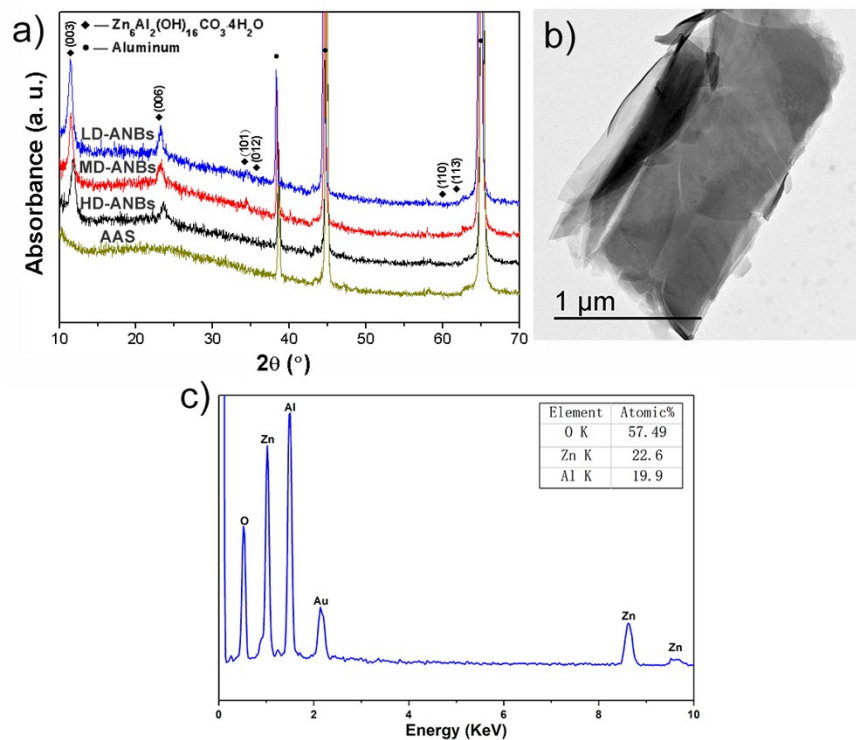

**Figure S5.** Characteristics of the artificial nanoblades. a) XRD patterns of pristine AAS and ANBs on AAS. b) TEM image of a single Zn–Al layered double hydroxides nanoblade detached from ANBs. c) EDS spectrum of ANBs.

**F: Correlation between artificial nanoblades morphology and bactericidal performance.**

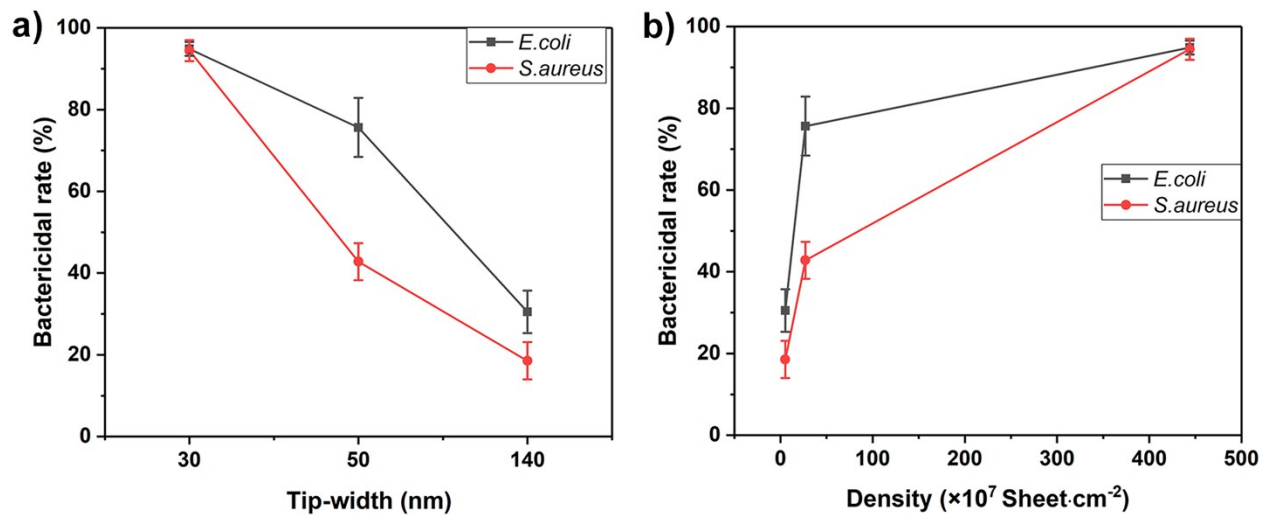

**Figure S6.** Correlation between artificial nanoblades morphology and bactericidal performance.

a) Tip-width of nanoblade. b) Density of nanoblade.



**G: Difference in  $\cdot\text{O}_2^-$  and  $\text{H}_2\text{O}_2$  productivity of  $\text{H}_2\text{O}$  and ANBs in dark**

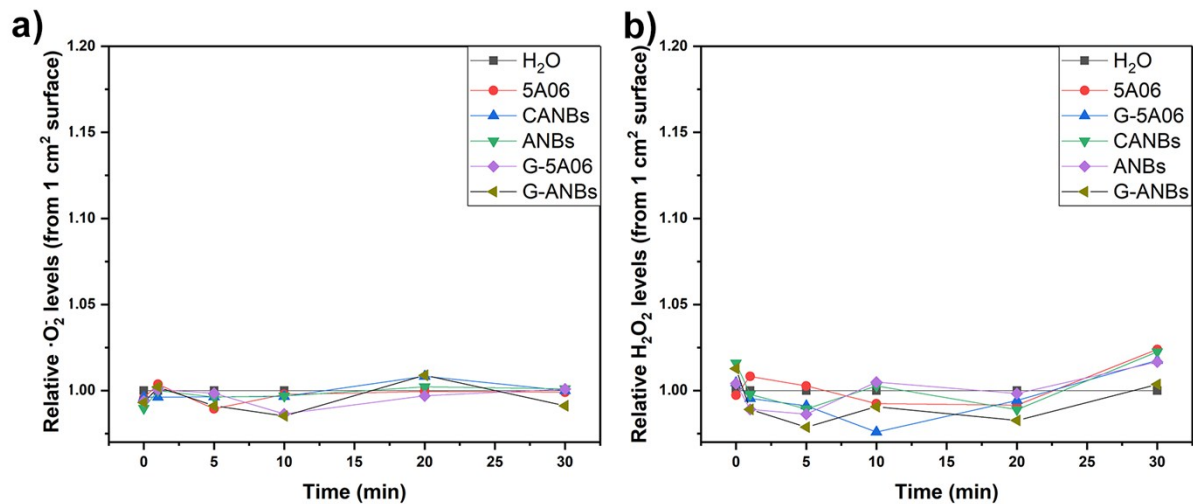

**Figure S7.** Production of  $\cdot\text{O}_2^-$  and  $\text{H}_2\text{O}_2$  of 5A06 aluminum alloy sheet and ANBs as the function of time.

## H: Difference in Zn<sup>2+</sup> and Al<sup>3+</sup> productivity of ANBs

**TABLE S1.** Atomic Absorption Spectrometry Results of Zn<sup>2+</sup> and Al<sup>3+</sup> Leaching Out from ANBs

| Samples           | Concentration of Zn <sup>2+</sup><br>(mg/L) | Concentration of Al <sup>3+</sup><br>(mg/L) |
|-------------------|---------------------------------------------|---------------------------------------------|
| Compacted HD-ANBs | 0.623 ± 0.084                               | 0.756 ± 0.179                               |
| LD-ANBs           | 0.212 ± 0.021                               | 0.305 ± 0.067                               |
| MD-ANBs           | 0.227 ± 0.019                               | 0.387 ± 0.073                               |
| HD-ANBs           | 0.192 ± 0.018                               | 0.329 ± 0.078                               |
